# Supplementary material for: Mapping the phylogeny and lineage history of geographically distinct BCG vaccine strains
Source: PubMed Central journal article supplement (PMC10483423; doi:10.1099/mgen.0.001077), 2023-08-01
Supplement: mgen-9-1077-s001.pdf [file mgen-9-1077-s001.pdf]

| Strain          | Sub-strain                                      | Reference or experimental strain | Freeze dry date | Early/late | Morph. In MGIT | Growth on 7H11 slope | Growth in MGIT | CTAB extraction performed | Isolate name |
|-----------------|-------------------------------------------------|----------------------------------|-----------------|------------|----------------|----------------------|----------------|---------------------------|--------------|
| BCG-Dutch       | Dutch                                           | Reference                        | Unknown         | Early      | n/a            | No                   | No             | Yes                       | Isolate1     |
| BCG-Russia      | Moscow strain                                   | Reference                        | Unknown         | Early      | Flake          | Yes                  | Yes            | Yes                       | Isolate5     |
|                 | Soviet strain                                   | Unknown                          | Unknown         | Early      | Flake          | Yes                  | Yes            | Yes                       | Isolate47    |
| BCG-Japan       | Tokyo                                           | Reference                        | Unknown         | Early      | Flake          | Yes                  | Yes            | Yes                       | Isolate3     |
|                 | Reference vaccine, Japanese                     | Reference                        | Unknown         | Early      | Flake          | Yes                  | Yes            | Yes                       | Isolate13    |
|                 | WHO                                             | Reference                        | Unknown         | Early      | Flake          | Yes                  | Yes            | Yes                       | Isolate37    |
|                 | 172, batch C9                                   | Reference                        | 26/10/1976      | Early      | Clump          | Yes                  | Yes            | Yes                       | Isolate38    |
|                 | 172, batch A                                    | Reference                        | 03/10/1960      | Early      | Flake          | Yes                  | Yes            | Yes                       | Isolate39    |
|                 | 172, batch B                                    | Reference                        | Unknown         | Early      | Flake          | Yes                  | Yes            | Yes                       | Isolate40    |
|                 | 172, batch C                                    | Reference                        | Unknown         | Early      | Flake          | Yes                  | Yes            | Yes                       | Isolate41    |
|                 | 172, batch D                                    | Reference                        | Unknown         | Early      | Flake          | Yes                  | Yes            | Yes                       | Isolate42    |
|                 | 172, batch E                                    | Reference                        | Unknown         | Early      | Flake          | Yes                  | Yes            | Yes                       | Isolate43    |
|                 | WHO, batch C                                    | Unknown                          | Unknown         | Early      | Flake          | Yes                  | Yes            | Yes                       | Isolate44    |
|                 | WHO, batch D                                    | Unknown                          | Unknown         | Early      | n/a            | No                   | No             | No                        | n/a          |
| WHO, batch F    | Unknown                                         | Unknown                          | Early           | n/a        | No             | No                   | No             | n/a                       |              |
| BCG-Danish      | 121                                             | Experimental                     | Unknown         | Late       | Flake          | Yes                  | Yes            | Yes                       | Isolate9     |
|                 | 122                                             | Experimental                     | Unknown         | Late       | n/a            | No                   | No             | No                        | n/a          |
|                 | 121 (Tom Osborn)                                | Experimental                     | Unknown         | Late       | Clump          | Yes                  | Yes            | Yes                       | Isolate15    |
|                 | Copenhagen strain, batch F10/A, made in England | Experimental                     | 27/02/1962      | Late       | Flake          | Yes                  | Yes            | Yes                       | Isolate16    |
|                 | Former Danish strain                            | Experimental                     | 16/02/1967      | Late       | n/a            | Yes                  | No             | Yes                       | Isolate20    |
|                 | 1331, sub-lot A                                 | Reference                        | 29/09/1960      | Late       | Flake          | Yes                  | Yes            | Yes                       | Isolate21    |
|                 | 1331, sub-lot B                                 | Reference                        | 29/09/1960      | Late       | Flake          | Yes                  | Yes            | Yes                       | Isolate22    |
|                 | 1331, sub-lot C                                 | Reference                        | 29/09/1960      | Late       | Flake          | Yes                  | Yes            | Yes                       | Isolate23    |
|                 | 1331, sub-lot D                                 | Reference                        | 29/09/1960      | Late       | Clump          | Yes                  | Yes            | Yes                       | Isolate24    |
| 1331, sub-lot E | Reference                                       | 29/09/1960                       | Late            | Flake      | Yes            | Yes                  | Yes            | Isolate25                 |              |

|                  |                                                           |              |            |      |       |     |     |     |           |
|------------------|-----------------------------------------------------------|--------------|------------|------|-------|-----|-----|-----|-----------|
|                  | WHO                                                       | Reference    | Unknown    | Late | Flake | Yes | Yes | Yes | Isolate26 |
|                  | batch 32                                                  | Unknown      | Unknown    | Late | n/a   | No  | No  | No  | n/a       |
|                  | SSI, Copenhagen                                           | Unknown      | Unknown    | Late | n/a   | No  | No  | No  | n/a       |
| BCG-Prague       | Czechoslovakian strain                                    | Reference    | Unknown    | Late | Flake | Yes | Yes | Yes | Isolate7  |
|                  | Czechoslovakian strain, (from BCG-Japan)                  | Unknown      | Unknown    | Late | n/a   | No  | No  | No  | n/a       |
| BCG-Tice         | USA, Chicago strain, IL105(s)50                           | Unknown      | Unknown    | Late | n/a   | No  | No  | Yes | Isolate48 |
|                  | USA, Chicago strain, 7498                                 | Unknown      | Unknown    | Late | n/a   | No  | No  | No  | n/a       |
| BCG-Connaught    | Connaught strain, Toronto                                 | Reference    | Unknown    | Late | n/a   | No  | No  | Yes | Isolate11 |
|                  | Diluent from Connaught                                    | Unknown      | Unknown    | Late | n/a   | No  | No  | No  | n/a       |
| BCG-Glaxo        | French (Institut Merieux Lyon) strain, derived from Glaxo | Unknown      | Unknown    | Late | n/a   | Yes | No  | Yes | Isolate4  |
|                  | Glaxo, Greenford                                          | Reference    | Unknown    | Late | n/a   | No  | No  | No  | Isolate6  |
|                  | 1331/121, batch no. C8                                    | Unknown      | 20/10/1976 | Late | Clump | Yes | Yes | Yes | Isolate17 |
|                  | 1077/597, batch no. 295                                   | Unknown      | Unknown    | Late | Clump | Yes | Yes | Yes | n/a       |
| BCG-Pasteur      | French (Institut Pasteur Paris)                           | Unknown      | Unknown    | Late | Clump | Yes | Yes | Yes | Isolate8  |
|                  | WHO                                                       | Reference    | Unknown    | Late | Flake | Yes | Yes | Yes | Isolate28 |
|                  | 1173 P58                                                  | Reference    | 04/02/1968 | Late | Clump | Yes | Yes | Yes | Isolate29 |
|                  | 1173, batch C10, P2 Pasteur strain                        | Reference    | 27/10/1976 | Late | Clump | Yes | Yes | Yes | Isolate30 |
|                  | 1138                                                      | Experimental | Unknown    | Late | n/a   | No  | No  | Yes | Isolate31 |
|                  | Batch 203                                                 | Unknown      | Unknown    | Late | Clump | Yes | Yes | Yes | Isolate32 |
|                  | Pasteur, batch A                                          | Unknown      | Unknown    | Late | Flake | Yes | Yes | Yes | Isolate33 |
|                  | Pasteur, batch B                                          | Unknown      | Unknown    | Late | Clump | Yes | No  | Yes | Isolate34 |
|                  | Pasteur, batch E                                          | Unknown      | Unknown    | Late | Clump | Yes | Yes | Yes | Isolate35 |
| Pasteur, batch F | Unknown                                                   | Unknown      | Late       | n/a  | No    | No  | No  | n/a |           |
| BCG-Brussels     | Institut Pasteur Brabant, Brussels                        | Unknown      | Unknown    | ?    | n/a   | No  | No  | No  | n/a       |
| BCG-Dakar        | Dakar strain                                              | Unknown      | Unknown    | Late | Clump | Yes | Yes | Yes | Isolate2  |

Table S1. List of strains in the historic, lyophilised laboratory collection. Total number of strains in the collection = 50, total number successfully cultured = 35, total number successfully extracted = 39, total successfully sequenced = 38.

| Isolate name | Strain    | Sub-strain                                                | Average depth |
|--------------|-----------|-----------------------------------------------------------|---------------|
| Isolate1     | Dutch     | Dutch                                                     | 3.9           |
| Isolate 2    | Dakar     | Dakar strain                                              | 14.2          |
| Isolate 3    | Japan     | Tokyo                                                     | 60.8          |
| Isolate 4    | Glaxo     | French (Institut Merieux Lyon) strain, derived from Glaxo | 0.08          |
| Isolate 5    | Russian   | Russian strain, Moscow                                    | 16.5          |
| Isolate 7    | Prague    | Czechoslovakian strain (Prague)                           | 1550.3        |
| Isolate 8    | Pasteur   | French (Institut Pasteur Paris)                           | 341.3         |
| Isolate 9    | Danish    | 121                                                       | 769.2         |
| Isolate 11   | Connaught | Connaught strain, Toronto                                 | 26.8          |
| Isolate 13   | Japan     | Reference vaccine, Japanese                               | 1482.8        |
| Isolate 15   | Danish    | 121 (Tom Osborn)                                          | 49.1          |
| Isolate 16   | Danish    | Copenhagen strain, batch F10/A, made in England           | 18.04         |
| Isolate 17   | Glaxo     | 1331/121, batch no. C8                                    | 50.4          |
| Isolate 18   | Glaxo     | 1077/597, batch no. 295                                   | 131.7         |
| Isolate 20   | Danish    | Former Danish strain                                      | 1.9           |
| Isolate 21   | Danish    | 1331, sub-lot A                                           | 335.7         |
| Isolate 22   | Danish    | 1331, sub-lot B                                           | 23.9          |
| Isolate 23   | Danish    | 1331, sub-lot C                                           | 226.5         |
| Isolate 24   | Danish    | 1331, sub-lot D                                           | 345.4         |
| Isolate 25   | Danish    | 1331, sub-lot E                                           | 51.2          |
| Isolate 26   | Danish    | WHO                                                       | 220.9         |
| Isolate 28   | Pasteur   | WHO                                                       | 33.8          |
| Isolate 29   | Pasteur   | 1173 P58                                                  | 4.3           |
| Isolate 30   | Pasteur   | 1173, batch C10, P2 Pasteur strain                        | 268.2         |
| Isolate 31   | Pasteur   | 1138                                                      | 7.5           |
| Isolate 32   | Pasteur   | batch 203                                                 | 29.3          |

|            |         |                                 |       |
|------------|---------|---------------------------------|-------|
| Isolate 33 | Pasteur | batch A                         | 260.6 |
| Isolate 34 | Pasteur | batch B                         | 287.9 |
| Isolate 35 | Pasteur | batch E                         | 82.6  |
| Isolate 37 | Japan   | WHO                             | 7.7   |
| Isolate 38 | Japan   | 172, batch C9                   | 69.1  |
| Isolate 39 | Japan   | 172, batch A                    | 17.2  |
| Isolate 40 | Japan   | 172, batch B                    | 242.8 |
| Isolate 41 | Japan   | 172, batch C                    | 64.3  |
| Isolate 42 | Japan   | 172, batch D                    | 83.07 |
| Isolate 43 | Japan   | 172, batch E                    | 358.6 |
| Isolate 44 | Japan   | WHO batch C                     | 77.7  |
| Isolate 47 | Russian | Soviet strain                   | 125.6 |
| Isolate 48 | Tice    | USA, Chicago strain, IL105(s)50 | 0.06  |

Table S2. List of isolates extracted and sequenced in this study and the average sequencing depth. Project number PRJEB60755.

| RefSeq_assembly_id | Genome_accession | Description | Included in tree |
|--------------------|------------------|-------------|------------------|
|--------------------|------------------|-------------|------------------|

|               |                   |                                                                                                                                                         | generation<br>(Y/N) |
|---------------|-------------------|---------------------------------------------------------------------------------------------------------------------------------------------------------|---------------------|
| GCF_000009445 | NC_008769.1       | <i>Mycobacterium tuberculosis</i> variant <i>bovis</i> BCG str. Pasteur 1173P2, complete sequence                                                       | Y                   |
| GCF_000010685 | NC_012207.1       | <i>Mycobacterium tuberculosis</i> variant <i>bovis</i> BCG str. Tokyo 172, complete sequence                                                            | Y                   |
| GCF_000234725 | NC_016804.1       | <i>Mycobacterium tuberculosis</i> variant <i>bovis</i> BCG str. Mexico, complete sequence                                                               | Y                   |
| GCF_000338715 | NC_020245.2       | <i>Mycobacterium tuberculosis</i> variant <i>bovis</i> BCG str. Korea 1168P, complete sequence                                                          | Y                   |
| GCF_000967285 | NZ_AM412059.1     | <i>Mycobacterium tuberculosis</i> variant <i>bovis</i> BCG str. Moreau RDJ isolate SL.1 FAP RJ Passage B8S2 vaccine culture chromosome, complete genome | Y                   |
| GCF_001043255 | NZ_CP008744.1     | <i>Mycobacterium tuberculosis</i> variant <i>bovis</i> BCG strain 32.1 chromosome, complete genome                                                      | Y                   |
| GCF_001274555 | NZ_CP009243.1     | <i>Mycobacterium tuberculosis</i> variant <i>bovis</i> BCG strain Russia 368 chromosome, complete genome                                                | Y                   |
| GCF_001287005 | NZ_CUWN01000001.1 | <i>Mycobacterium tuberculosis</i> variant <i>bovis</i> BCG strain Phipps, whole genome shotgun sequence                                                 | Y                   |
| GCF_001287045 | NZ_CUWK01000001.1 | <i>Mycobacterium tuberculosis</i> variant <i>bovis</i> BCG strain Moreau, whole genome shotgun sequence                                                 | Y                   |
| GCF_001287065 | NZ_CUWE01000001.1 | <i>Mycobacterium tuberculosis</i> variant <i>bovis</i> BCG strain Birkhaug, whole genome shotgun sequence                                               | Y                   |
| GCF_001287105 | NZ_CUWP01000001.1 | <i>Mycobacterium tuberculosis</i> variant <i>bovis</i> BCG strain Sweden, whole genome shotgun sequence                                                 | Y                   |
| GCF_001287125 | NZ_CUWH01000001.1 | <i>Mycobacterium tuberculosis</i> variant <i>bovis</i> BCG strain Danish, whole genome shotgun sequence                                                 | Y                   |
| GCF_001287165 | NZ_CUWL01000001.1 | <i>Mycobacterium tuberculosis</i> variant <i>bovis</i> BCG strain Pasteur, whole genome shotgun sequence                                                | Y                   |
| GCF_001287185 | NZ_CUWJ01000001.1 | <i>Mycobacterium tuberculosis</i> variant <i>bovis</i> BCG strain Glaxo, whole genome shotgun sequence                                                  | Y                   |
| GCF_001287205 | NZ_CUWO01000001.1 | <i>Mycobacterium tuberculosis</i> variant <i>bovis</i> BCG strain Russia, whole genome shotgun sequence                                                 | Y                   |
| GCF_001287225 | NZ_CUWM01000001.1 | <i>Mycobacterium tuberculosis</i> variant <i>bovis</i> BCG strain Prague, whole genome shotgun sequence                                                 | Y                   |
| GCF_001287245 | NZ_CUWG01000001.1 | <i>Mycobacterium tuberculosis</i> variant <i>bovis</i> BCG strain China, whole genome shotgun sequence                                                  | Y                   |
| GCF_001287325 | NZ_CUWF01000001.1 | <i>Mycobacterium tuberculosis</i> variant <i>bovis</i> BCG strain Connaught, whole genome shotgun sequence                                              | Y                   |
| GCF_001287365 | NZ_CUWQ01000001.1 | <i>Mycobacterium tuberculosis</i> variant <i>bovis</i> BCG strain Tice, whole genome shotgun sequence                                                   | Y                   |
| GCF_001287425 | NZ_CUWR01000001.1 | <i>Mycobacterium tuberculosis</i> variant <i>bovis</i> BCG strain Japan, whole genome shotgun sequence                                                  | Y                   |
| GCF_001287485 | NZ_CUWI01000001.1 | <i>Mycobacterium tuberculosis</i> variant <i>bovis</i> BCG strain Frappier, whole genome shotgun sequence                                               | Y                   |
| GCF_001293105 | NZ_CP011455.1     | <i>Mycobacterium bovis</i> strain BCG.1 genome                                                                                                          | N                   |
| GCF_001483905 | NZ_CP013741.1     | <i>Mycobacterium tuberculosis</i> variant <i>bovis</i> strain BCG.1 (Russia) chromosome, complete genome                                                | Y                   |
| GCF_001580385 | NZ_CP014566.1     | <i>Mycobacterium tuberculosis</i> variant <i>bovis</i> BCG str. Tokyo 172 chromosome, complete genome                                                   | Y                   |
| GCF_003703995 | NZ_CP033310.1     | <i>Mycobacterium tuberculosis</i> variant <i>bovis</i> BCG strain BCG-S48 chromosome                                                                    | N                   |
| GCF_003704015 | NZ_CP033311.1     | <i>Mycobacterium tuberculosis</i> variant <i>bovis</i> BCG strain BCG_S49 chromosome                                                                    | Y                   |
| GCF_015482805 | NZ_CP064405.1     | <i>Mycobacterium tuberculosis</i> variant <i>bovis</i> BCG strain BCG SL 222 Sofia chromosome, complete genome                                          | Y                   |

Table S3. BCG reference genomes used in this project, which were obtained from the NCBI database, and their NCBI accession numbers.

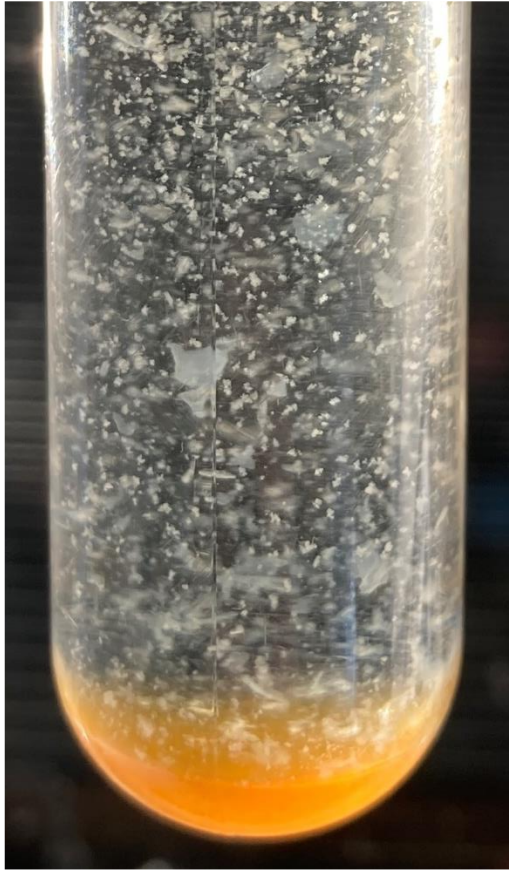

**BCG-Russia (flake)**

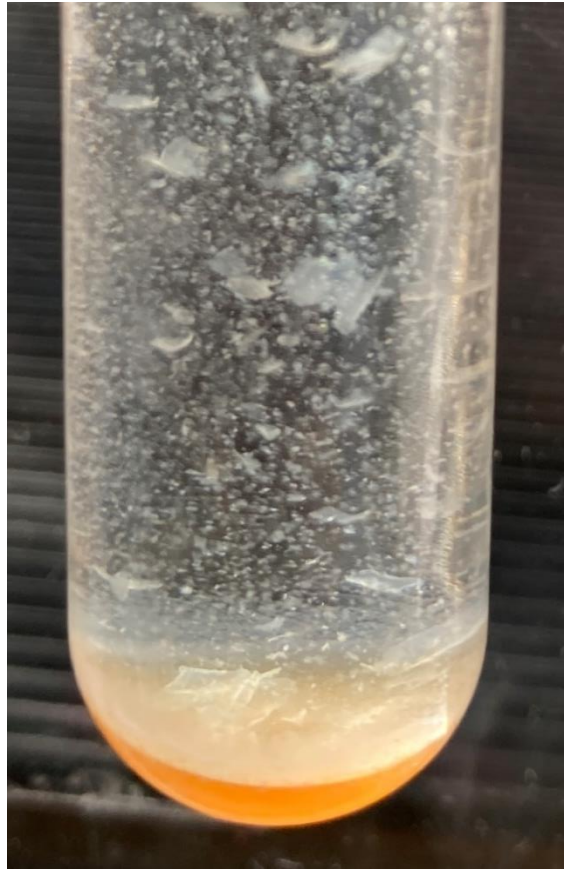

**BCG-Japan (flake)**

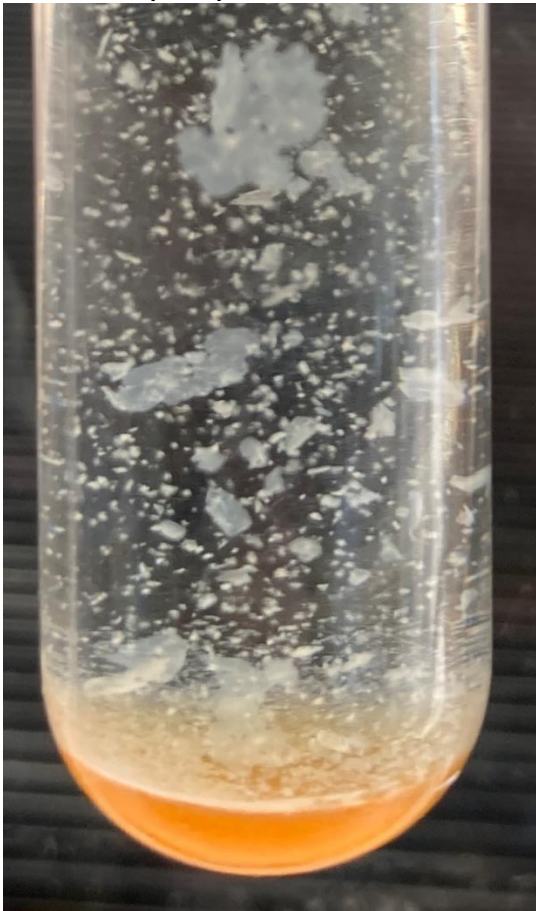

**BCG-Danish (flake)**

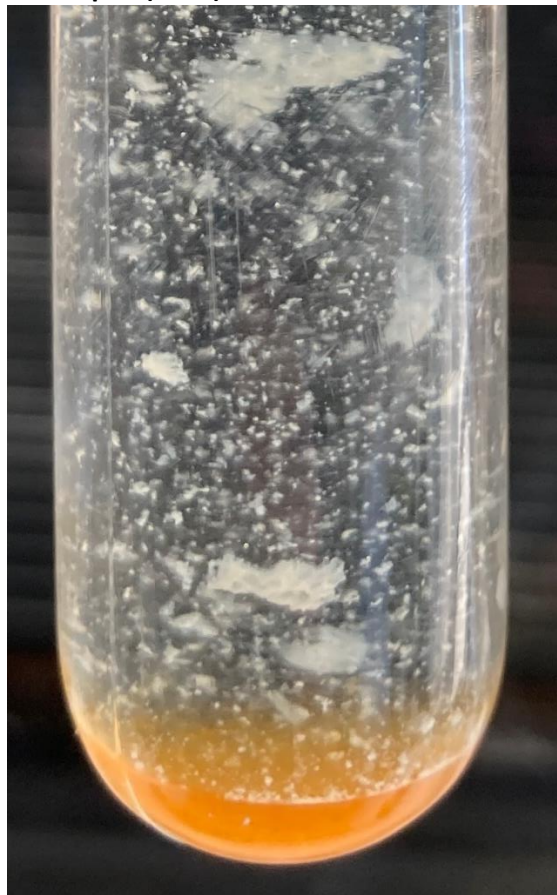

**BCG-Prague (flake)**

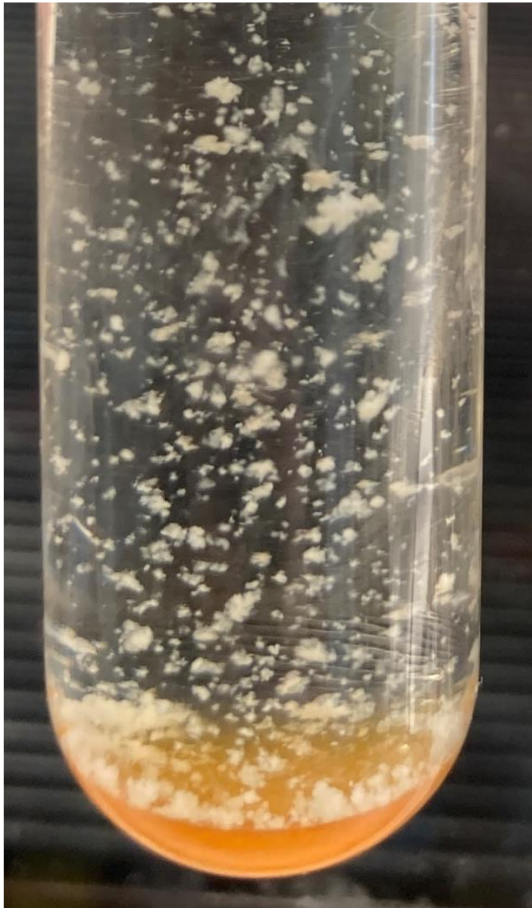

**BCG-Glaxo (clump)**

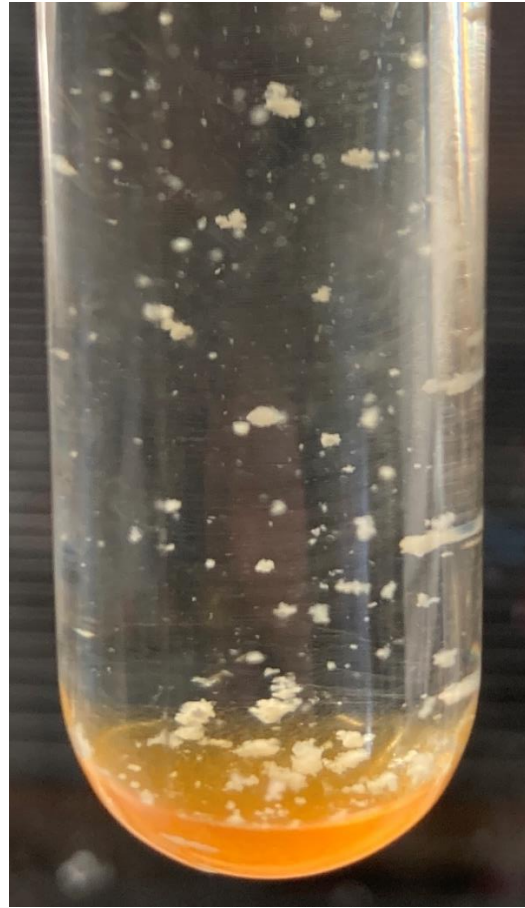

**BCG-Pasteur (clump)**

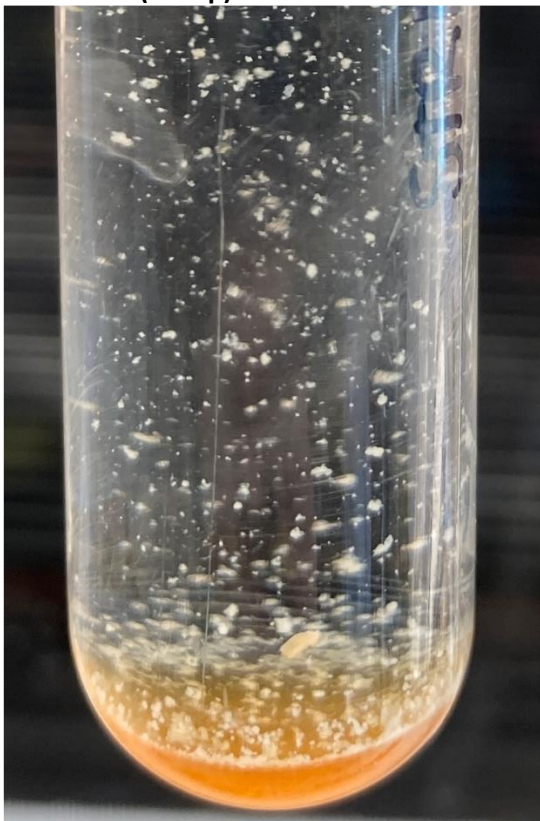

**BCG-Dakar (clump)**

Figure S3. Morphology of each geographically classified strain when grown in MGIT liquid culture.
